# Supplementary material for: The Association between Emergency Department Length of Stay and In-Hospital Mortality in Older Patients Using Machine Learning: An Observational Cohort Study
Source: MDPI journal article supplement (doi:10.3390/jcm12144750), 2023-07-18
Supplement: s1 [file s1]

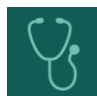

## Supplementary Materials

**Table S1.** Characteristics of the study emergency department participants according to IHM (survivors and non-survivors).

| Characteristics                         | Age 60 (n = 78,847)    |                          |
|-----------------------------------------|------------------------|--------------------------|
|                                         | Survivors (n = 75,872) | Non-survivors (n = 2975) |
| Age, years, median [IQR]                | 75 [67,84]             | 80 [70,87]               |
| Male, n (%)                             | 35707 (47.1)           | 1504 (50.6)              |
| Race, n (%)                             |                        |                          |
| Unknown                                 | 1102 (1.5)             | 326 (11)                 |
| White                                   | 55412 (73)             | 2017 (67.8)              |
| Black                                   | 11355 (15)             | 320 (10.8)               |
| Hispanic                                | 2972 (3.9)             | 60 (2)                   |
| Asian                                   | 2371 (3.1)             | 126 (4.2)                |
| Other                                   | 2660 (3.5)             | 126 (4.2)                |
| Insurance, n (%)                        |                        |                          |
| Unknown                                 | 3340 (4.4)             | 630 (21.2)               |
| Medicare                                | 52606 (69.3)           | 1835 (61.7)              |
| Medicaid                                | 103 (0.1)              | 3 (0.1)                  |
| Other                                   | 19823 (26.1)           | 507 (17)                 |
| Triage and acuity score, n (%)          |                        |                          |
| Resuscitation                           | 11029 (14.5)           | 1536 (51.6)              |
| Emergent                                | 36895 (48.6)           | 1068 (35.9)              |
| Urgent                                  | 27726 (36.5)           | 369 (12.4)               |
| Less urgent                             | 215 (0.3)              | 2 (0.1)                  |
| Nonurgent                               | 7 (0)                  |                          |
| Mode of transport, n (%)                |                        |                          |
| Unknown                                 | 2081 (2.7)             | 231 (7.8)                |
| Walk-in                                 | 32357 (42.6)           | 531 (17.8)               |
| Ambulance                               | 41082 (54.1)           | 2133 (71.7)              |
| Helicopter                              | 264 (0.3)              | 76 (2.6)                 |
| Other                                   | 88 (0.1)               | 4 (0.1)                  |
| ED waiting time, min, median [IQR]      | 10 [6,30.2]            | 6 [1,11]                 |
| Length of stay in ED, min, median [IQR] | 368 [273.8,498]        | 289 [205,409]            |
| Boarding time, min, median [IQR]        | 143 [104,219]          | 139 [101,209]            |
| Charlson score, n (%)                   |                        |                          |
| 0                                       | 52218 (68.8)           | 1783 (59.9)              |
| 1                                       | 16197 (21.3)           | 798 (26.8)               |
| 2                                       | 4064 (5.4)             | 207 (7)                  |
| >2                                      | 3393 (4.5)             | 187 (6.3)                |
| Quality Assurance Issue (QAI), n (%)    | 1258 (1.7)             | 702 (23.6)               |
| Patient Safety Events (PSE), n (%)      | 109 (0.1)              | 20 (0.7)                 |
| ICU admission, n (%)                    | 14203 (18.7)           | 2465 (82.9)              |

ED, emergency department; IQR, interquartile range. This table compares the characteristics of survivors and non-survivors in the older group (age  $\geq 60$ ). The distribution of all variables was statistically different between the survivors and non-survivors, namely  $p < 0.001$ .

**Table S2.** Characteristics of the non-ICU and ICU admitted older ( $\geq 60$ ) ED patients.

| Characteristics                         | Non-ICU Admitted<br>(n = 62,179) | ICU Admitted<br>(n = 16,668) | P value |
|-----------------------------------------|----------------------------------|------------------------------|---------|
| Age, years, median [IQR]                | 75 [67,84]                       | 75 [67,84]                   | 0.002   |
| Male, n (%)                             | 28,678 (46.1)                    | 8553 (51.2)                  | <0.001  |
| Race, n (%)                             |                                  |                              | <0.001  |
| Unknown                                 | 426 (0.7)                        | 1002 (6)                     |         |
| White                                   | 45645 (73.4)                     | 11784 (70.7)                 |         |
| Black                                   | 9534 (15.3)                      | 2141 (12.8)                  |         |
| Hispanic                                | 2524 (4.1)                       | 508 (3)                      |         |
| Asian                                   | 1939 (3.1)                       | 558 (3.3)                    |         |
| Other                                   | 2111 (3.4)                       | 675 (4)                      |         |
| Language-English, n (%)                 | 53617 (86.2)                     | 14596 (87.6)                 | <0.001  |
| Insurance, n (%)                        |                                  |                              | <0.001  |
| Unknown                                 | 1635 (2.6)                       | 2335 (14)                    |         |
| Medicare                                | 43887 (70.6)                     | 10554 (63.3)                 |         |
| Medicaid                                | 80 (0.1)                         | 26 (0.2)                     |         |
| Other                                   | 16577 (26.7)                     | 3753 (22.5)                  |         |
| Triage and acuity score, n (%)          |                                  |                              | <0.001  |
| Resuscitation                           | 5895 (9.5)                       | 6670 (40)                    |         |
| Emergent                                | 30307 (48.7)                     | 7656 (45.9)                  |         |
| Urgent                                  | 25763 (41.4)                     | 2332 (14)                    |         |
| Less urgent                             | 209 (0.3)                        | 8 (0)                        |         |
| Nonurgent                               | 5 (0)                            | 2 (0)                        |         |
| Mode of transport, n (%)                |                                  |                              | <0.001  |
| Unknown                                 | 1082 (1.7)                       | 1230 (7.4)                   |         |
| Walk-in                                 | 28790 (46.3)                     | 4098 (24.6)                  |         |
| Ambulance                               | 32168 (51.7)                     | 11047 (66.3)                 |         |
| Helicopter                              | 67 (0.1)                         | 273 (1.6)                    |         |
| Other                                   | 72 (0.1)                         | 20 (0.1)                     |         |
| ED waiting time, min, median [IQR]      | 12 [6,38]                        | 7 [4,13]                     | <0.001  |
| Length of stay in ED, min, median [IQR] | 382 [287,512]                    | 301 [216,420]                | <0.001  |
| Boarding time, min, median [IQR]        | 144 [105,221]                    | 139 [99,211]                 | <0.001  |
| Charlson score, n (%)                   |                                  |                              | <0.001  |
| 0                                       | 43449 (69.9)                     | 10552 (63.3)                 |         |
| 1                                       | 12632 (20.3)                     | 4363 (26.2)                  |         |
| 2                                       | 3241 (5.2)                       | 1030 (6.2)                   |         |
| >2                                      | 2857 (4.6)                       | 723 (4.3)                    |         |
| Quality Assurance Issue (QAI), n (%)    | 423 (0.7)                        | 1537 (9.2)                   | <0.001  |
| Patient Safety Events (PSE), n (%)      | 55 (0.1)                         | 74 (0.4)                     | <0.001  |
| Death in hospital, n (%)                | 510 (0.8)                        | 2465 (14.8)                  | <0.001  |

ED, emergency department; IQR, interquartile range. This table compares the characteristics of ICU admitted patients and non-ICU admitted patients in the older group (age  $\geq 60$ ).

**Table S3.** Characteristics of survivors and non-survivors in the older ED participants according to EDLOS.

| Characteristics                            | Low EDLOS (n = 25,806)       |                               | High EDLOS (n = 53,041)      |                               |
|--------------------------------------------|------------------------------|-------------------------------|------------------------------|-------------------------------|
|                                            | Survivors (n = 24,235) 93.9% | Non-survivors (n = 1571) 6.1% | Survivors (n = 51,637) 97.4% | Non-survivors (n = 1401) 2.6% |
| Age, years, median [IQR]                   | 75 [67,83]                   | 80 [70.5,87]                  | 74 [67,84]                   | 79 [70,87]                    |
| Male, n (%)                                | 12218 (50.4)                 | 807 (51.4)                    | 23489 (45.5)                 | 697 (49.6)                    |
| Race, n (%)                                |                              |                               |                              |                               |
| Unknown                                    | 763 (3.1)                    | 279 (17.8)                    | 339 (0.7)                    | 47 (3.3)                      |
| White                                      | 18086 (74.6)                 | 1005 (64)                     | 37326 (72.3)                 | 1012 (72.1)                   |
| Black                                      | 3013 (12.4)                  | 125 (8)                       | 8342 (16.2)                  | 195 (13.9)                    |
| Hispanic                                   | 820 (3.4)                    | 23 (1.5)                      | 2152 (4.2)                   | 37 (2.6)                      |
| Asian                                      | 650 (2.7)                    | 64 (4.1)                      | 1721 (3.3)                   | 62 (4.4)                      |
| Other                                      | 903 (3.7)                    | 75 (4.8)                      | 1757 (3.4)                   | 51 (3.6)                      |
| Language-English, n (%)                    | 21381 (88.2)                 | 1382 (88)                     | 44248 (85.7)                 | 1202 (85.6)                   |
| Insurance, n (%)                           |                              |                               |                              |                               |
| Unknown                                    | 1972 (8.1)                   | 517 (32.9)                    | 1368 (2.6)                   | 113 (8)                       |
| Medicare                                   | 16123 (66.5)                 | 803 (51.1)                    | 36483 (70.7)                 | 1032 (73.5)                   |
| Medicaid                                   | 35 (0.1)                     | 1 (0.1)                       | 68 (0.1)                     | 2 (0.1)                       |
| Other                                      | 6105 (25.2)                  | 250 (15.9)                    | 13718 (26.6)                 | 257 (18.3)                    |
| Triage and acuity score, n (%)             |                              |                               |                              |                               |
| Resuscitation                              | 5810 (24)                    | 1070 (68.1)                   | 5219 (10.1)                  | 466 (33.2)                    |
| Emergent                                   | 12138 (50.1)                 | 409 (26)                      | 24757 (47.9)                 | 659 (46.9)                    |
| Urgent                                     | 6248 (25.8)                  | 90 (5.7)                      | 21478 (41.6)                 | 279 (19.9)                    |
| Less urgent                                | 37 (0.2)                     | 2 (0.1)                       | 178 (0.3)                    |                               |
| Nonurgent                                  | 2 (0)                        |                               | 5 (0)                        |                               |
| Mode of transport, n (%)                   |                              |                               |                              |                               |
| Unknown                                    | 1433 (5.9)                   | 192 (12.2)                    | 648 (1.3)                    | 39 (2.8)                      |
| Walk-in                                    | 8854 (36.5)                  | 168 (10.7)                    | 23503 (45.5)                 | 363 (25.9)                    |
| Ambulance                                  | 13739 (56.7)                 | 1150 (73.2)                   | 27343 (53)                   | 983 (70)                      |
| Helicopter                                 | 184 (0.8)                    | 60 (3.8)                      | 80 (0.2)                     | 16 (1.1)                      |
| Other                                      | 25 (0.1)                     | 1 (0.1)                       | 63 (0.1)                     | 3 (0.2)                       |
| ED waiting time, min, median [Q1, Q3]      | 7 [5, 14]                    | 4 [0, 7]                      | 13 [6, 48]                   | 8 [5, 19]                     |
| Length of stay in ED, min, median [Q1, Q3] | 237 [196, 270]               | 210 [166.5, 253]              | 441 [364, 567]               | 419 [355, 531.2]              |
| Boarding time, min, median [Q1, Q3]        | 108 [84, 137]                | 112 [85, 144]                 | 174 [122, 273]               | 201.5 [139, 302]              |
| Charlson score, n (%)                      |                              |                               |                              |                               |
| 0                                          | 15432 (63.7)                 | 869 (55.3)                    | 36786 (71.2)                 | 914 (65.1)                    |
| 1                                          | 6213 (25.6)                  | 499 (31.8)                    | 9984 (19.3)                  | 299 (21.3)                    |
| 2                                          | 1495 (6.2)                   | 116 (7.4)                     | 2569 (5)                     | 91 (6.5)                      |
| >2                                         | 1095 (4.5)                   | 87 (5.5)                      | 2298 (4.5)                   | 100 (7.1)                     |
| Quality Assurance Issue (QAI), n (%)       | 436 (1.8)                    | 451 (28.7)                    | 822 (1.6)                    | 251 (17.9)                    |
| Patient Safety Events (PSE), n (%)         | 32 (0.1)                     | 7 (0.4)                       | 77 (0.1)                     | 13 (0.9)                      |
| ICU admission, n (%)                       | 6876 (28.4)                  | 1382 (88)                     | 7327 (14.2)                  | 1083 (77.1)                   |

ED, emergency department; IQR, interquartile range. This table compares the characteristics of survivors and non-survivors in the low EDLOS group (EDLOS < 300 min) and the high EDLOS group (EDLOS ≥ 300 min) in older population. The distribution of all variables was statistically different between the survivors and non-survivors, namely  $p < 0.001$ .

**Table S4.** The area under the receiver operator characteristic curve (AUROC) and 95% confidence intervals in predicting in-hospital mortality (IHM).

| Age population                        | Logistic Regression        | Random Forest       | XGBoost             | LightGBM                      |
|---------------------------------------|----------------------------|---------------------|---------------------|-------------------------------|
| Early elderly<br>(age 60–74 years)    | 0.881 [0.856,0.912]        | 0.875 [0.854,0.909] | 0.875 [0.853,0.910] | <b>0.892</b><br>[0.870,0.916] |
| Late elderly<br>(age 75–89 years)     | 0.879 [0.848,0.901]        | 0.868 [0.834,0.890] | 0.867 [0.833,0.892] | <b>0.886</b><br>[0.861,0.911] |
| Longevous elderly<br>(age ≥ 90 years) | <b>0.847</b> [0.797,0.890] | 0.839 [0.783,0.905] | 0.830 [0.772,0.869] | 0.838<br>[0.782,0.887]        |

**Table S5.** Distribution of 21 major diagnostic categories

| Chapter | Code Range | Description                                                                                         | Survivors,<br>Num (%) | Non-survivors,<br>Num (%) |
|---------|------------|-----------------------------------------------------------------------------------------------------|-----------------------|---------------------------|
| 1       | A00-B99    | Certain infectious and parasitic diseases                                                           | 994 (1.3)             | 200 (7)                   |
| 2       | C00-D49    | Neoplasms                                                                                           | 366 (0.5)             | 27 (0.9)                  |
| 3       | D50-D89    | Diseases of the blood and blood-forming organs and certain disorders involving the immune mechanism | 1412 (1.9)            | 50 (1.7)                  |
| 4       | E00-E89    | Endocrine, nutritional and metabolic diseases                                                       | 2636 (3.6)            | 70 (2.4)                  |
| 5       | F01-F99    | Mental, Behavioral and Neurodevelopmental disorders                                                 | 708 (1)               | 4 (0.1)                   |
| 6       | G00-G99    | Diseases of the nervous system                                                                      | 986 (1.3)             | 27 (0.9)                  |
| 7       | H00-H59    | Diseases of the eye and adnexa                                                                      | 247 (0.3)             | 1 (0)                     |
| 8       | H60-H95    | Diseases of the ear and mastoid process                                                             | 57 (0.1)              | 0 (0)                     |
| 9       | I00-I99    | Diseases of the circulatory system                                                                  | 12004 (16.2)          | 818 (28.5)                |
| 10      | J00-J99    | Diseases of the respiratory system                                                                  | 6563 (8.8)            | 387 (13.5)                |
| 11      | K00-K95    | Diseases of the digestive system                                                                    | 7920 (10.7)           | 215 (7.5)                 |
| 12      | L00-L99    | Diseases of the skin and subcutaneous tissue                                                        | 1840 (2.5)            | 12 (0.4)                  |
| 13      | M00-M99    | Diseases of the musculoskeletal system and connective tissue                                        | 2583 (3.5)            | 37 (1.3)                  |
| 14      | N00-N99    | Diseases of the genitourinary system                                                                | 4868 (6.6)            | 118 (4.1)                 |
| 15      | O00-O9A    | Pregnancy, childbirth and the puerperium                                                            | 0 (0)                 | 0 (0)                     |
| 16      | P00-P96    | Certain conditions originating in the perinatal period                                              | 2 (0)                 | 0 (0)                     |
| 17      | Q00-Q99    | Congenital malformations, deformations and chromosomal abnormalities                                | 10 (0)                | 0 (0)                     |
| 18      | R00-R99    | Symptoms, signs and abnormal clinical and laboratory findings, not elsewhere classified             | 23164 (31.2)          | 593 (20.7)                |
| 19      | S00-T88    | Injury, poisoning and certain other consequences of external causes                                 | 7840 (10.6)           | 307 (10.7)                |
| 20      | V00-Y99    | External causes of morbidity                                                                        | 0 (0)                 | 0 (0)                     |
| 21      | Z00-Z99    | Factors influencing health status and contact with health services                                  | 20 (0)                | 0 (0)                     |

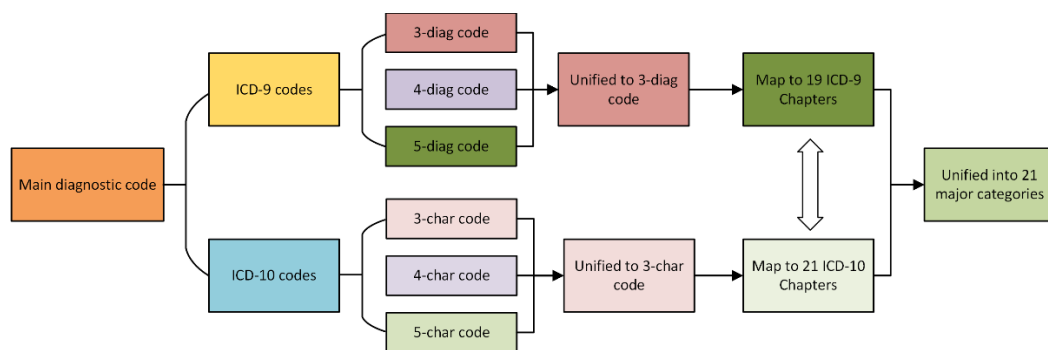

**Figure S1.** Flow chart of population classification based on diagnostic codes.

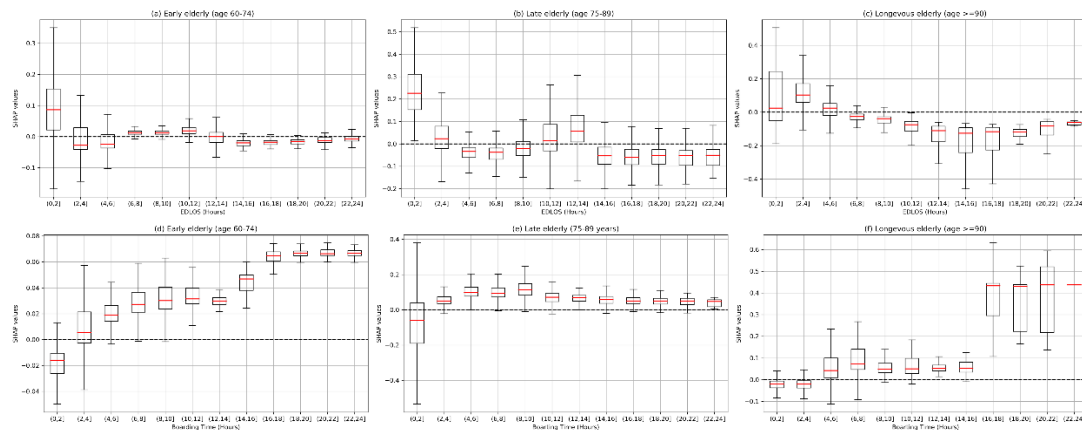

**Figure S2.** Effect of varying emergency department length of stay (EDLOS, in hours) and boarding time (BT, in hours) on in-hospital mortality (IHM) for three age groups based on the SHAP method. The box plots report the median and the interquartile range of the SHAP values of patients within the range of EDLOS and BT.
